# Supplementary material for: Tangential flow filtration for isolating exomeres and other nanoscale extracellular particles
Source: Royal Society of Chemistry journal article supplement (doi:10.1039/d6nr01765g), 2026-06-17
Supplement: d6nr01765g1.pdf [file d6nr01765g1.pdf]

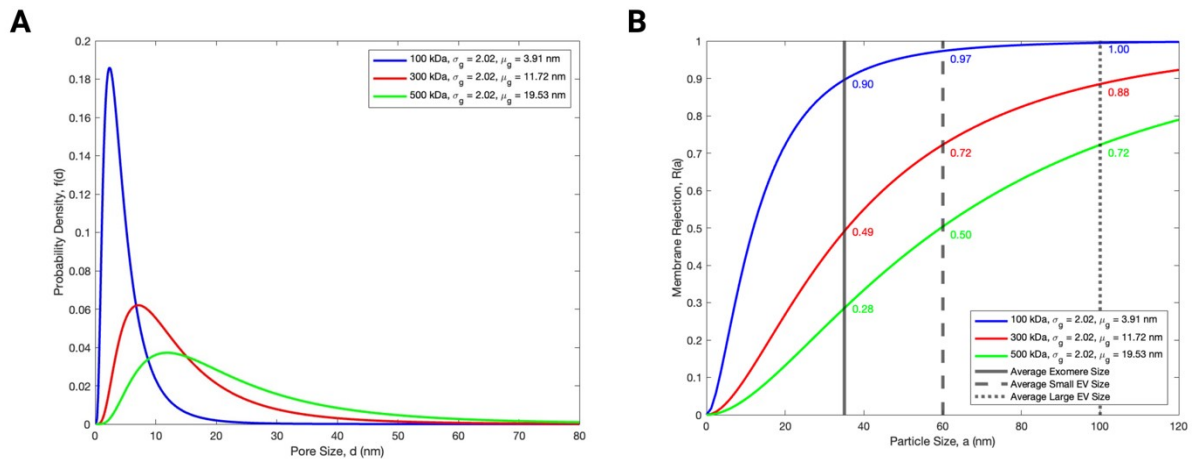

**Supplementary Figure 2:** Filter rejection predictions using log-normal models previously described.<sup>1</sup> **A.** Probability density functions showing the theoretical pore size distribution for 100, 300, and 500 kDa MWCO membranes. **B.** Membrane rejection performance for particles with a size of 35 nm (exomers), 60 nm (sEVs), and 100 nm (LEVs). The value chosen for geometric standard deviation ( $\sigma_g$ ) was adopted from prior literature based on measurements of asymmetric, modified polyethersulfone (PES) membranes which well-represent the commercial membranes used in this study.<sup>2</sup> Geometric means ( $\mu_g$ ) were calculated from  $\sigma_g$  and the mean pore diameter reported by the manufacturer.

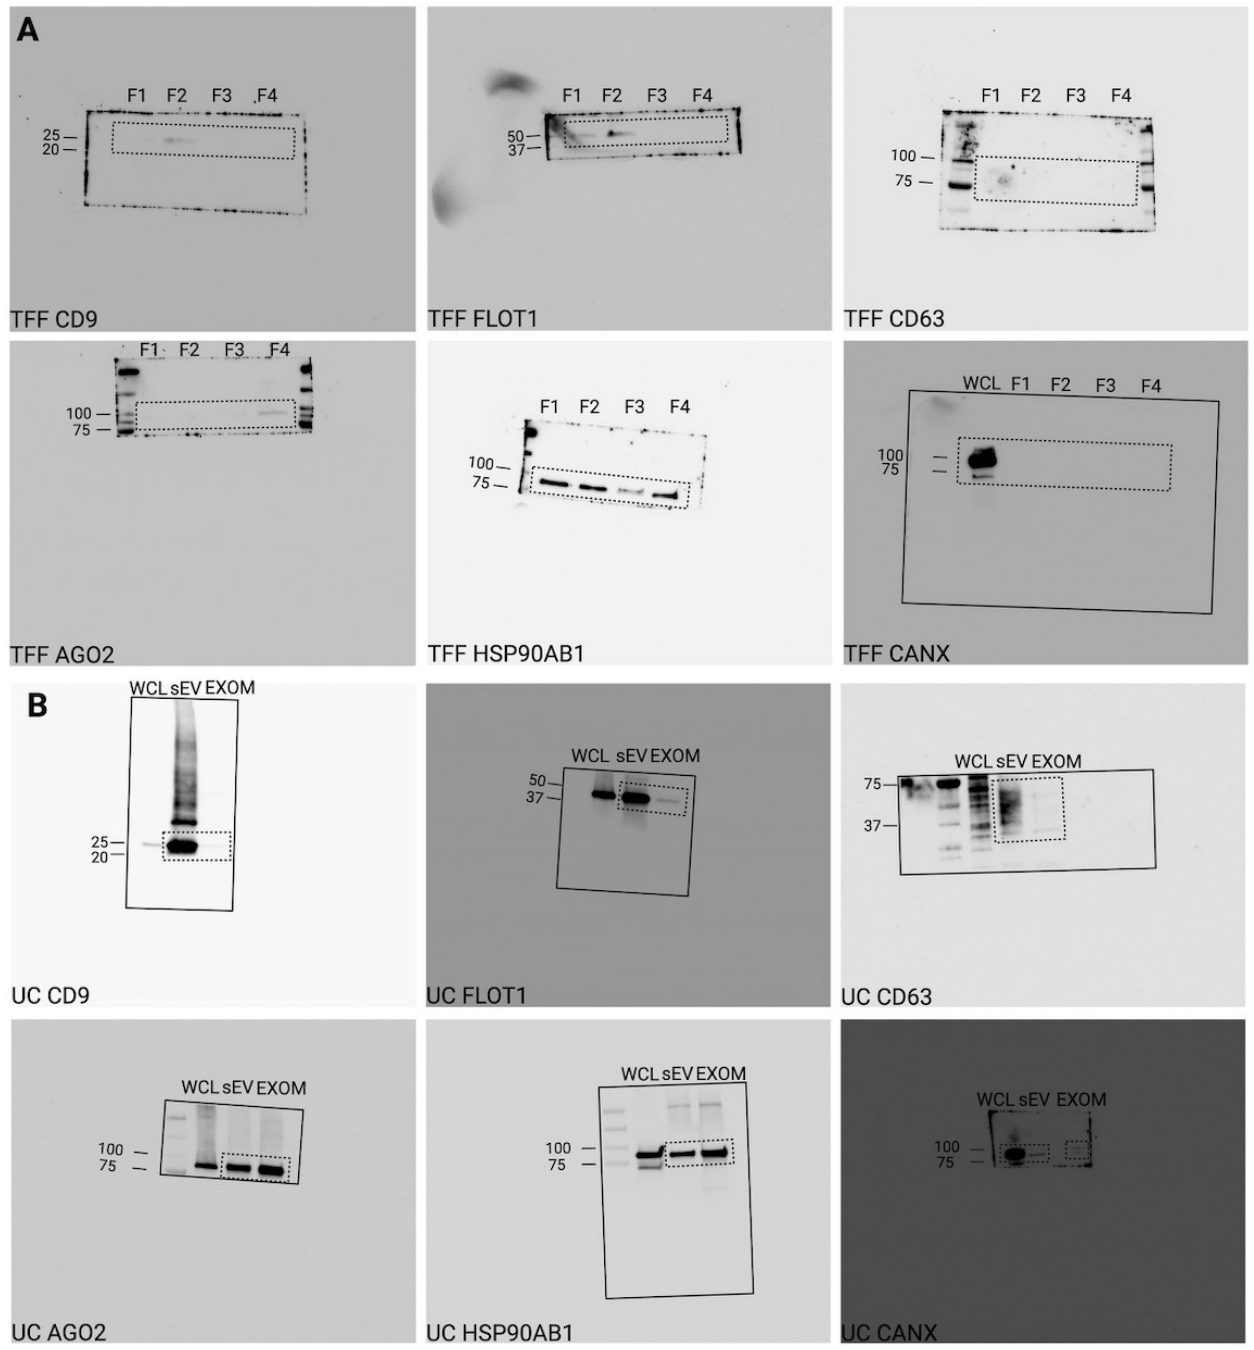

**Supplementary Figure 3:** Unprocessed Western blots for **A.** Tandem TFF and **B.** Differential UC. Dotted boxes represent the regions of the blots presented in **Fig. 2.** Solid boxes represent the outline of the complete blot.

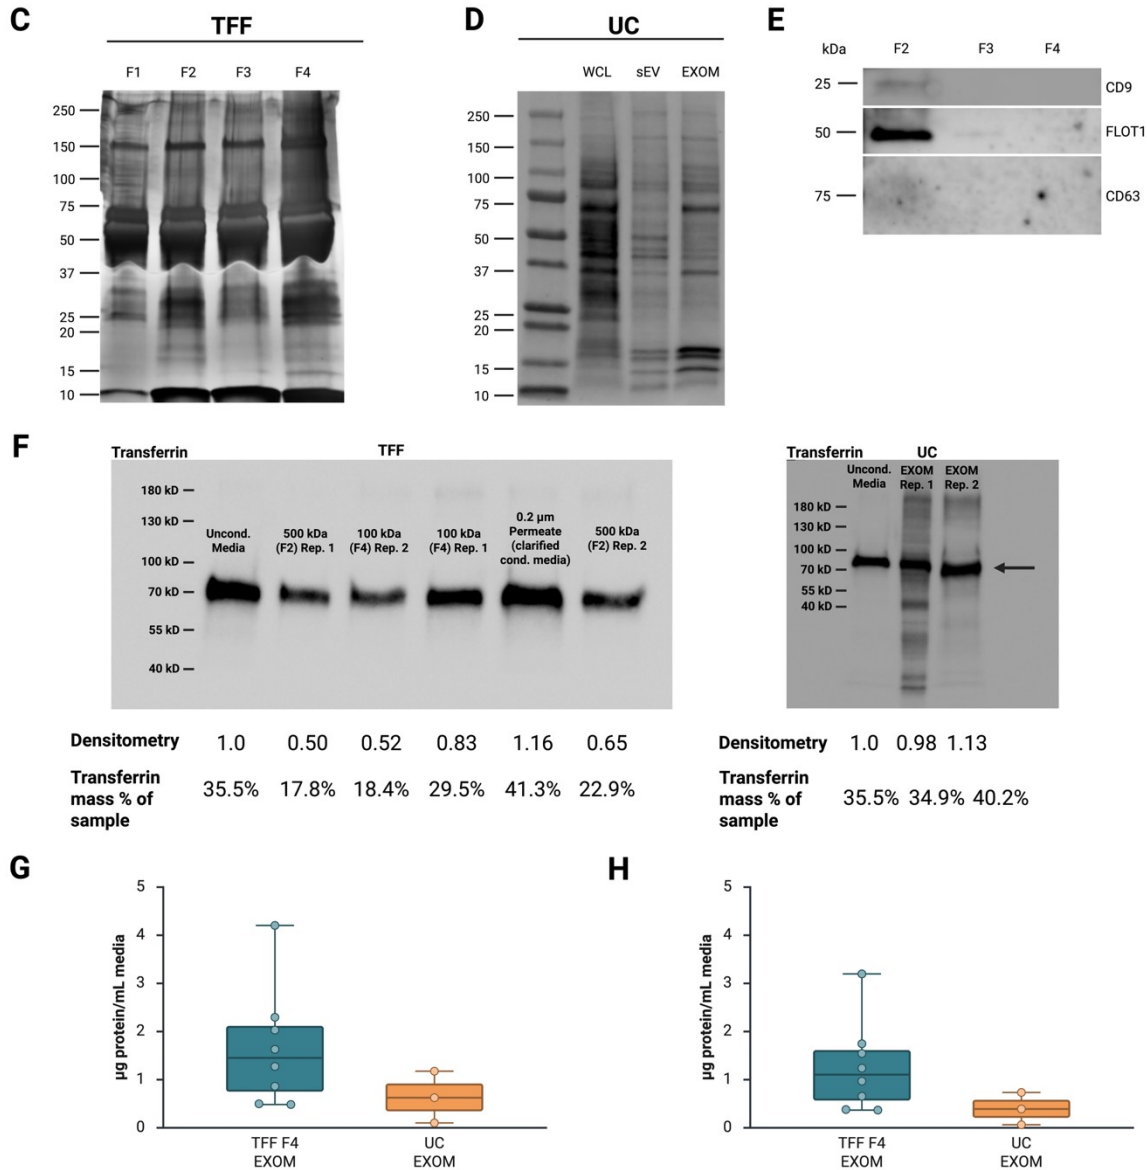

**Supplementary Figure 3 (continued):** Total protein analysis of TFF and UC isolates. **C.** Silver staining for TFF fractions and **D.** Revert700 fluorescent staining for UC fractions. **E.** Femto ECL Western blot showing absence of EV markers in NVEP fractions F3 and F4 in comparison to EVs in F2. **F.** Transferrin Western blots, densitometry, and abundance in TFF and UC samples by mass percent. 7.5  $\mu$ g of total protein were loaded per lane. **G.** Total protein content per mL of conditioned media processed for UC and TFF exomeres. **H.** Total protein content in TFF and UC exomere fractions after adjusting for copurifying transferrin. Figure created with BioRender.com.

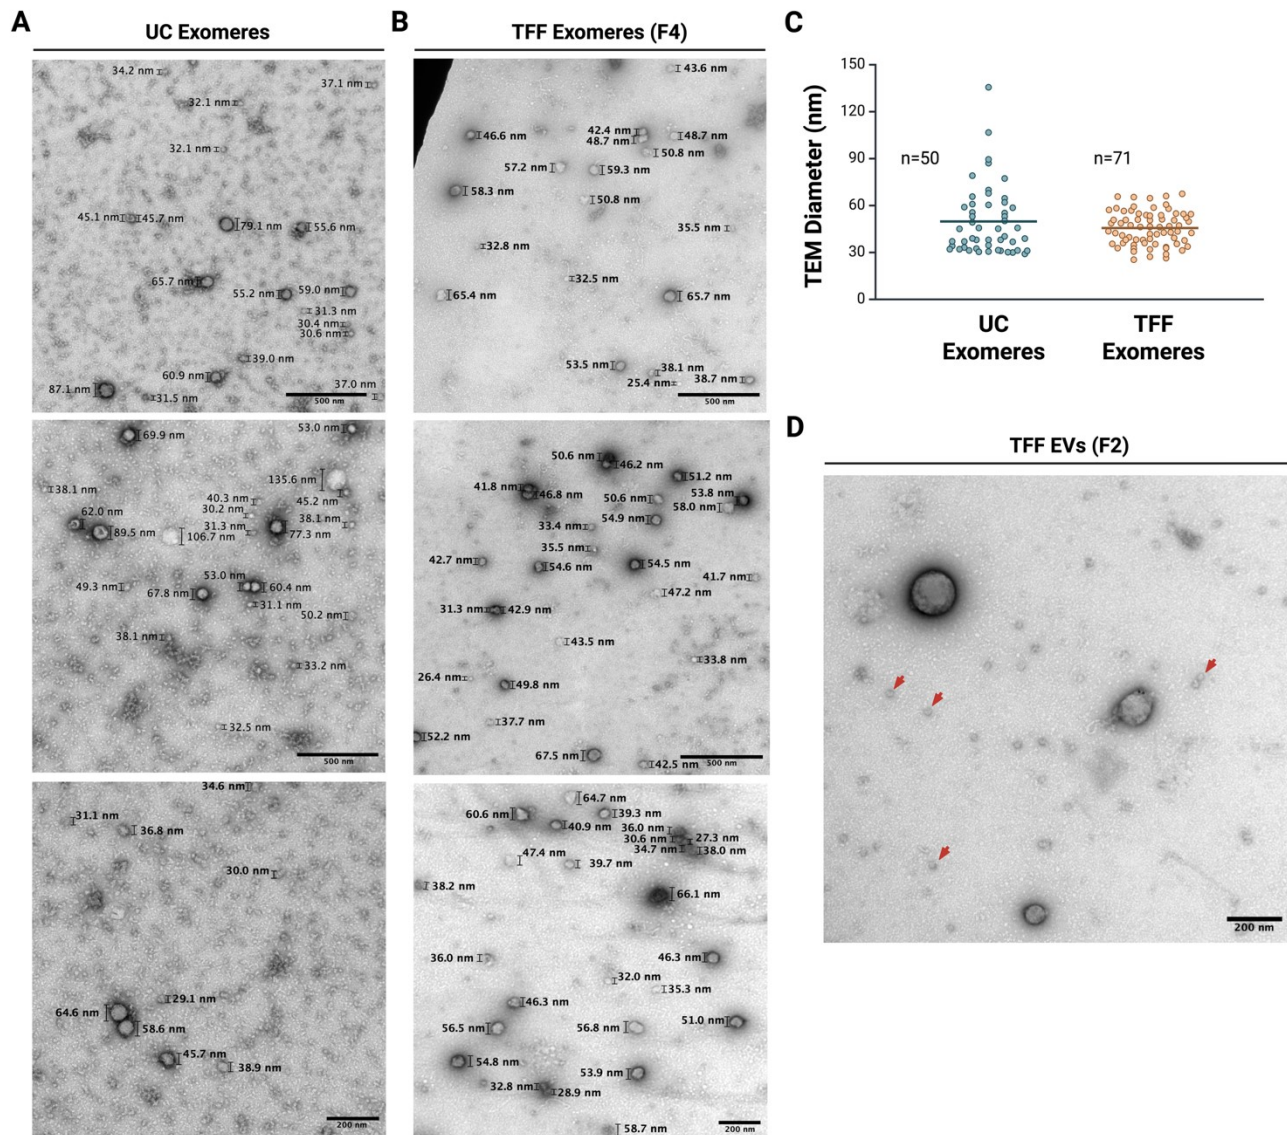

**Supplementary Figure 4:** TEM micrographs of particles measured for **A.** UC exomeres and **B.** TFF exomeres (F4). **C.** Size distribution of particles within each fraction based on manual measurement using the analyze > measure feature in ImageJ 1.54g (Java 1.8.0\_345). **D.** Exomere-shaped particles co-purify in TFF EV fraction F2. Figure created with BioRender.com.

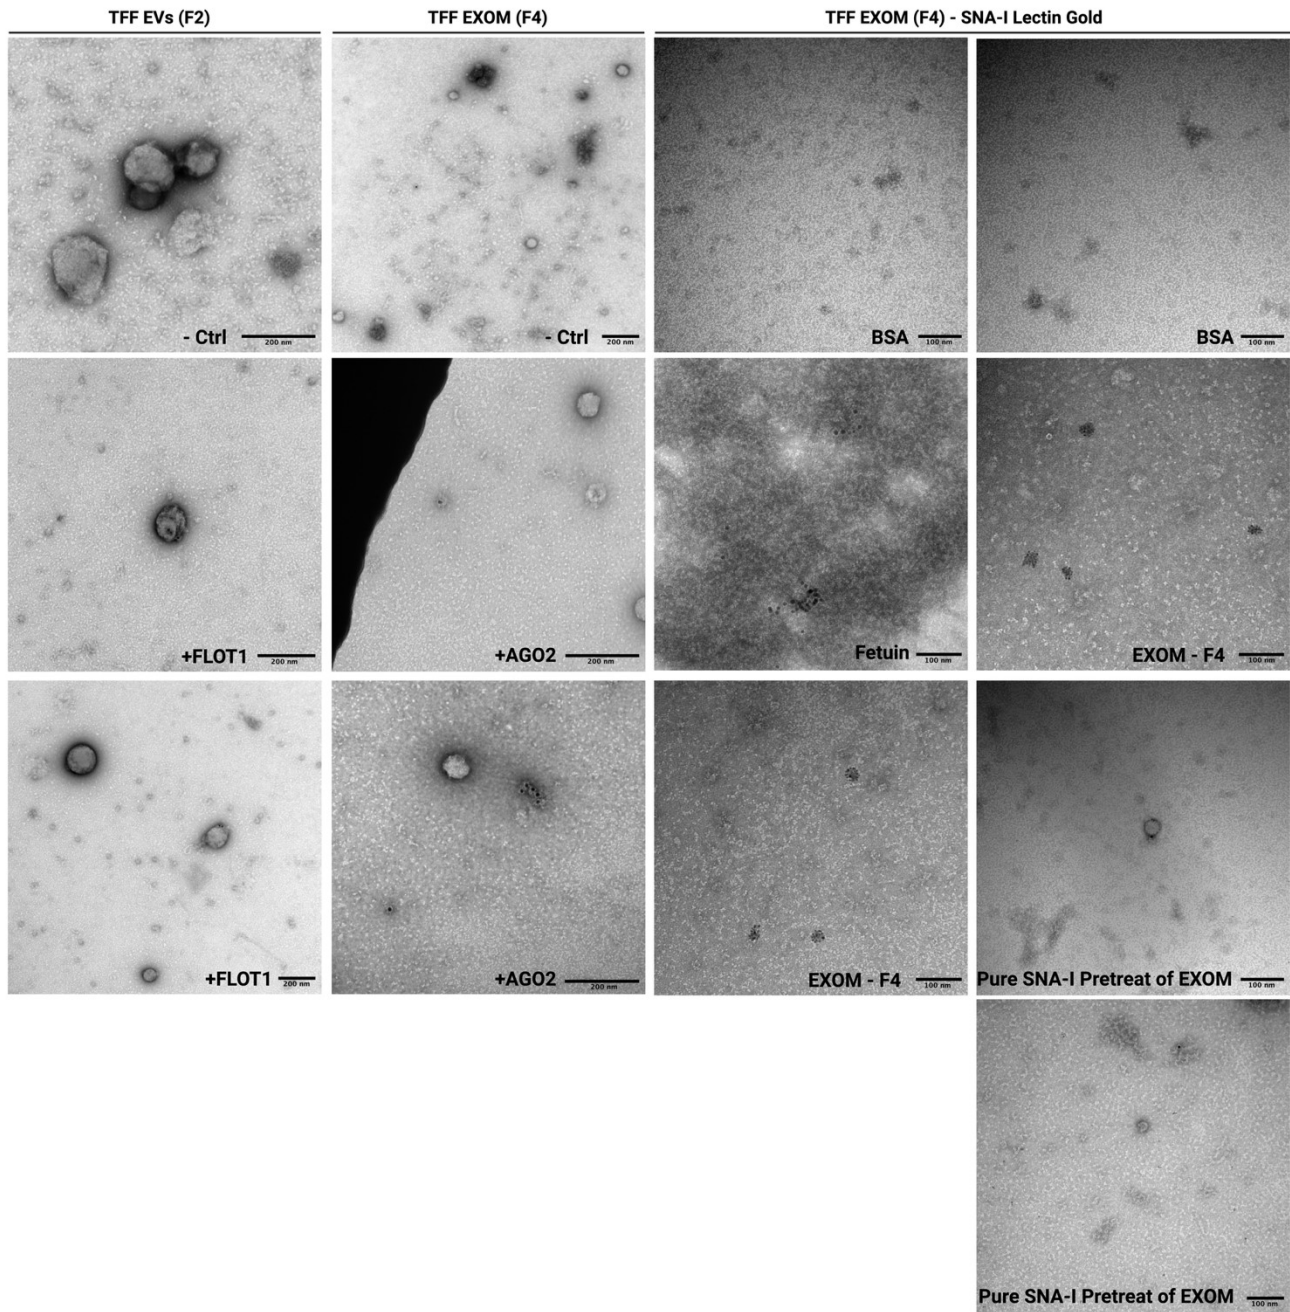

**Supplementary Figure 5:** Unprocessed TEM micrographs for immunogold and SNA-I lectin gold experiments.

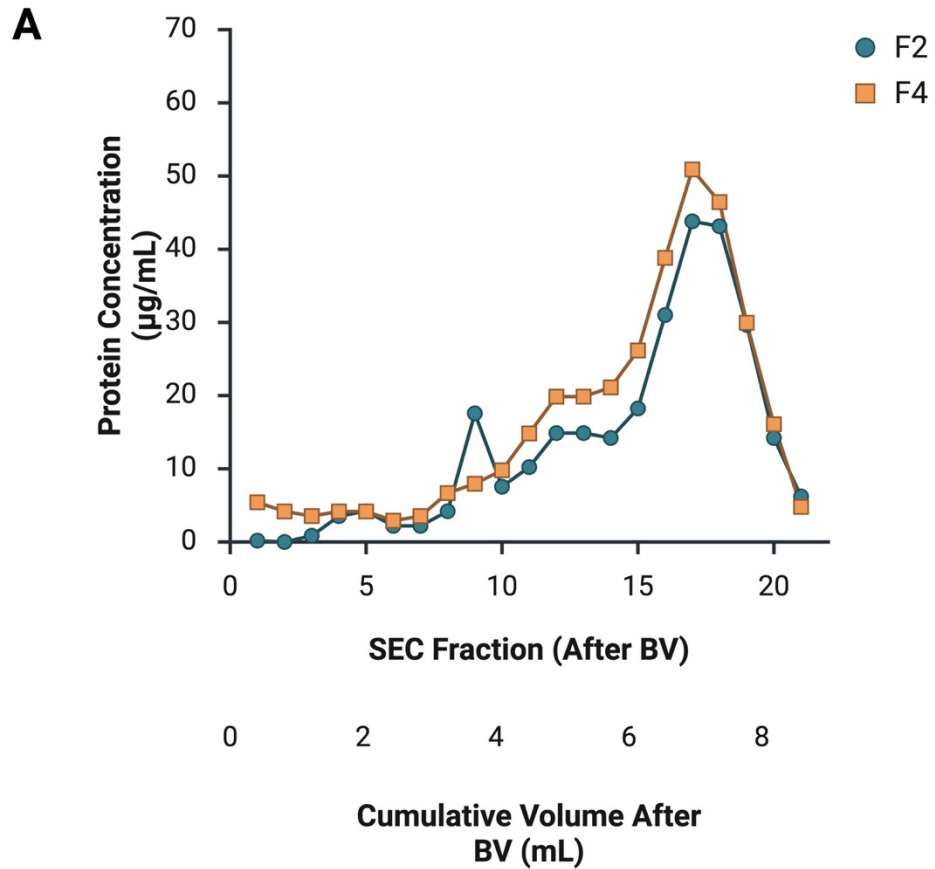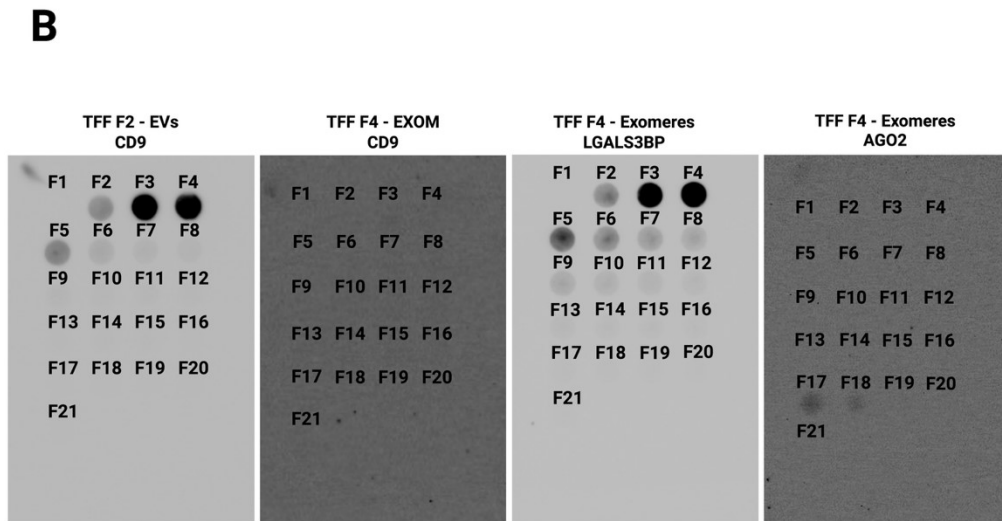

**Supplementary Figure 6:** Size exclusion chromatography (SEC) of TFF fractions F2 and F4. **A.** Protein concentration of SEC fractions as measured by BCA. 2 mL of buffer (void) volume (BV) was collected before elution of particle-containing fractions. **B.** Dot blots of SEC fractions for TFF F2 EVs and F4 exomeres. Blot brightness was uniformly adjusted in ImageJ 1.54g (Java 1.8.0\_345) to visualize weaker signals. Figure created with BioRender.com.

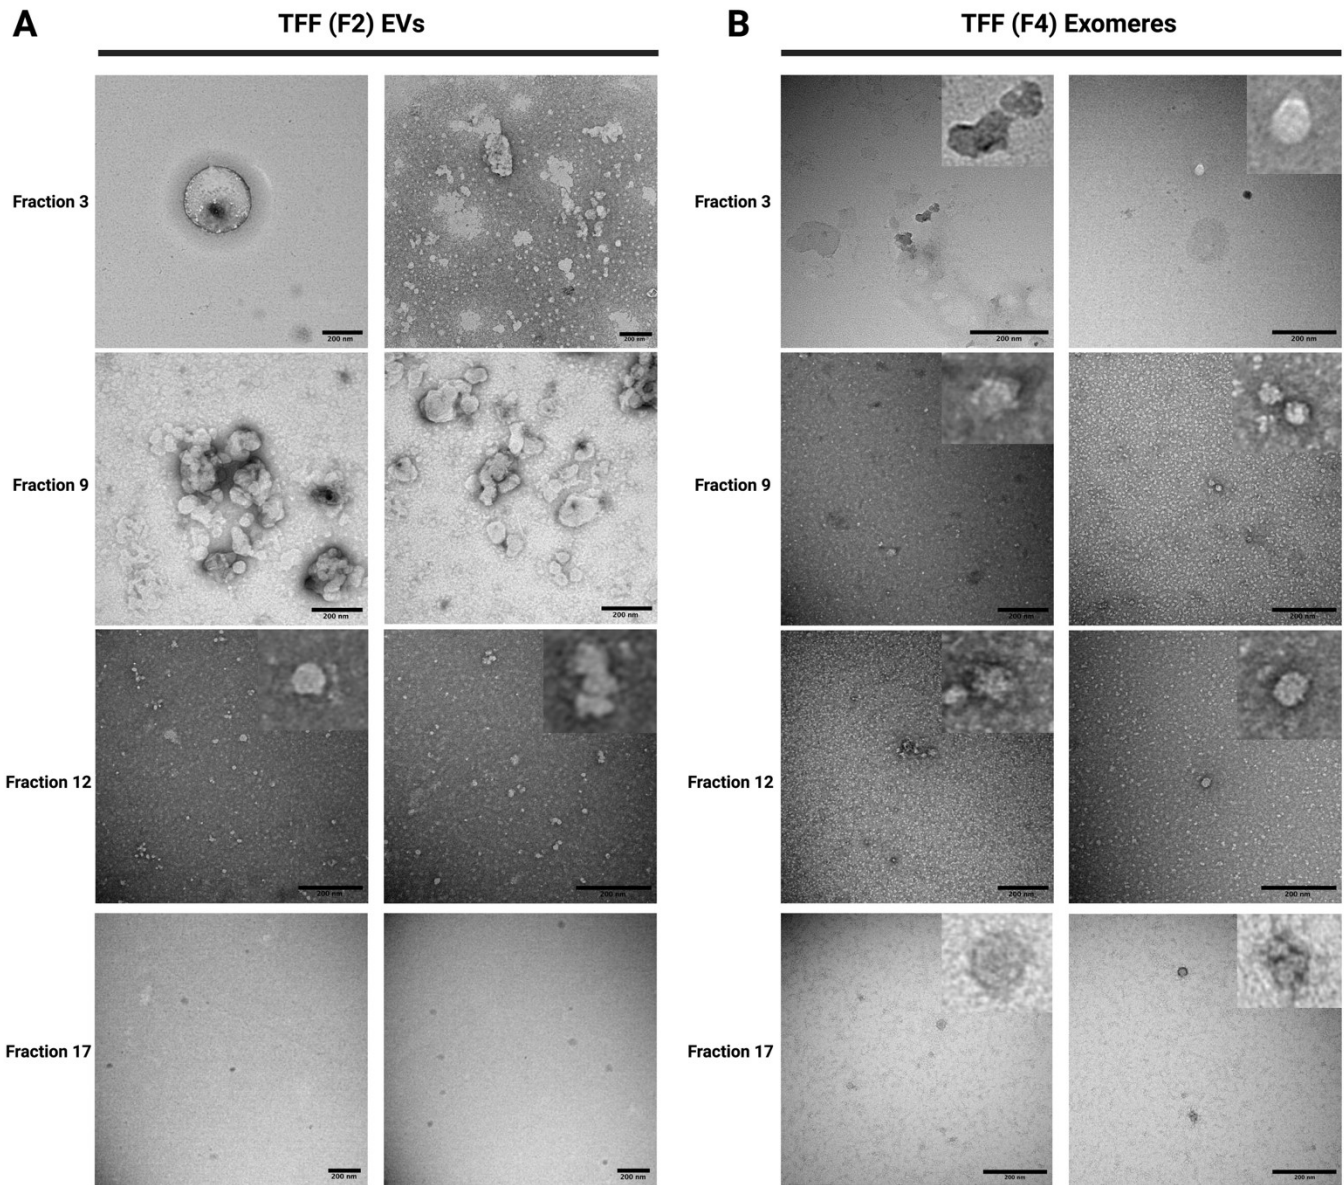

**Supplementary Figure 7: TEM of SEC fractions for TFF F2 EVs (A) and F4 exomeres (B).**

**A**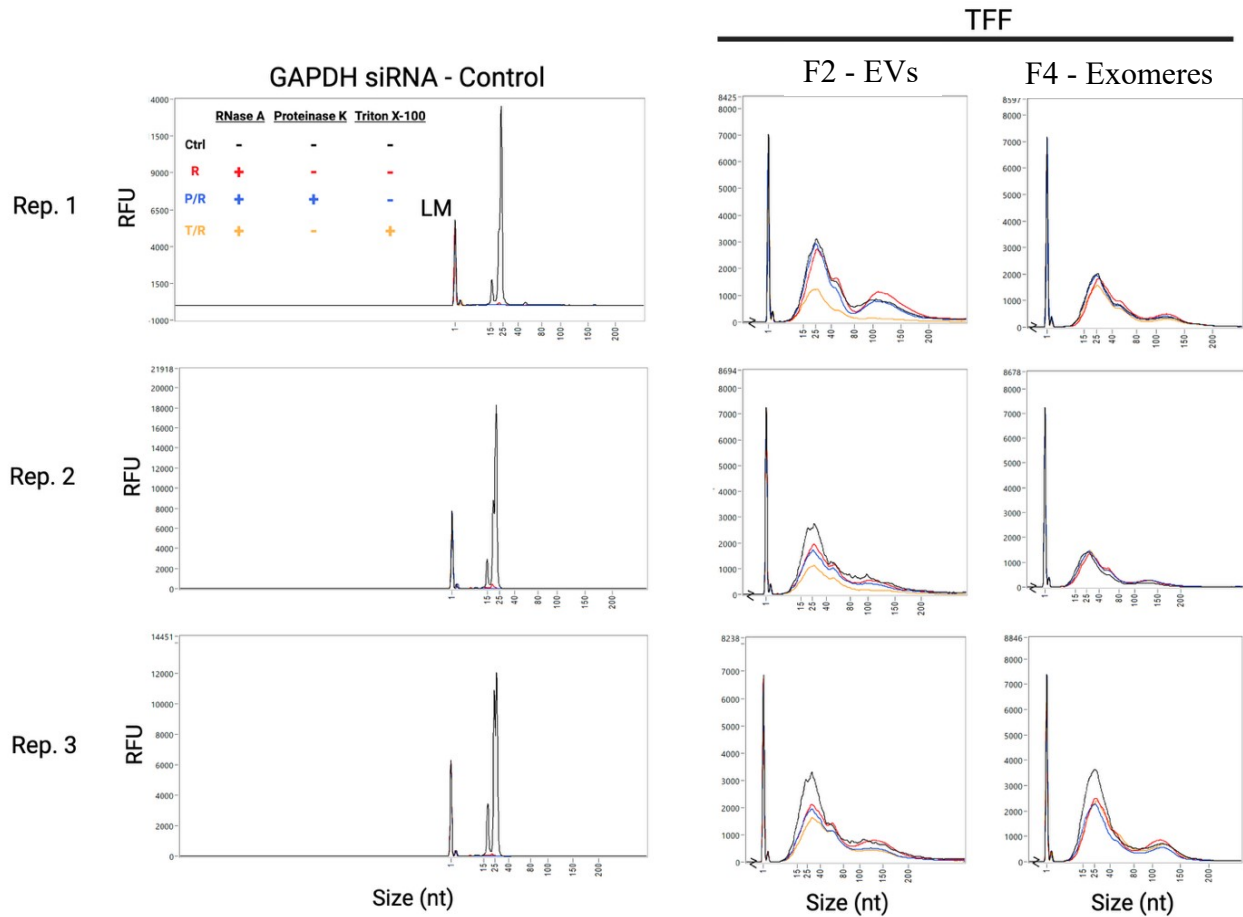**B**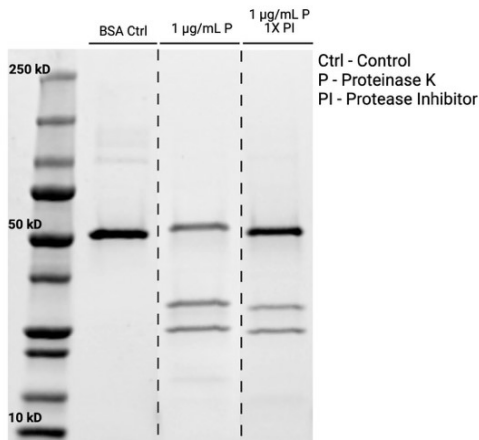**C**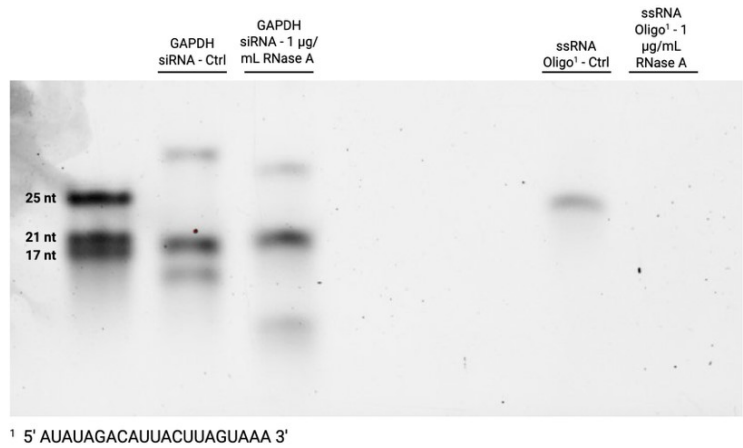

**Supplementary Figure 8: A.** RNA protection assay results representing three biological replicates. Treatment conditions: Ctrl (Control), R (RNase A only), P/R (Proteinase K/RNase A), T/R (Triton X-100/RNase A). **B.** Coomassie blue-stained PAGE gel of BSA treated with Proteinase K or Proteinase K and inhibitor. Gel was cropped to remove conditions not used in the RNase protection experiment. **C.** SYBR™ gold-stained PAGE gel of dsRNA and ssRNA treated with RNase A.

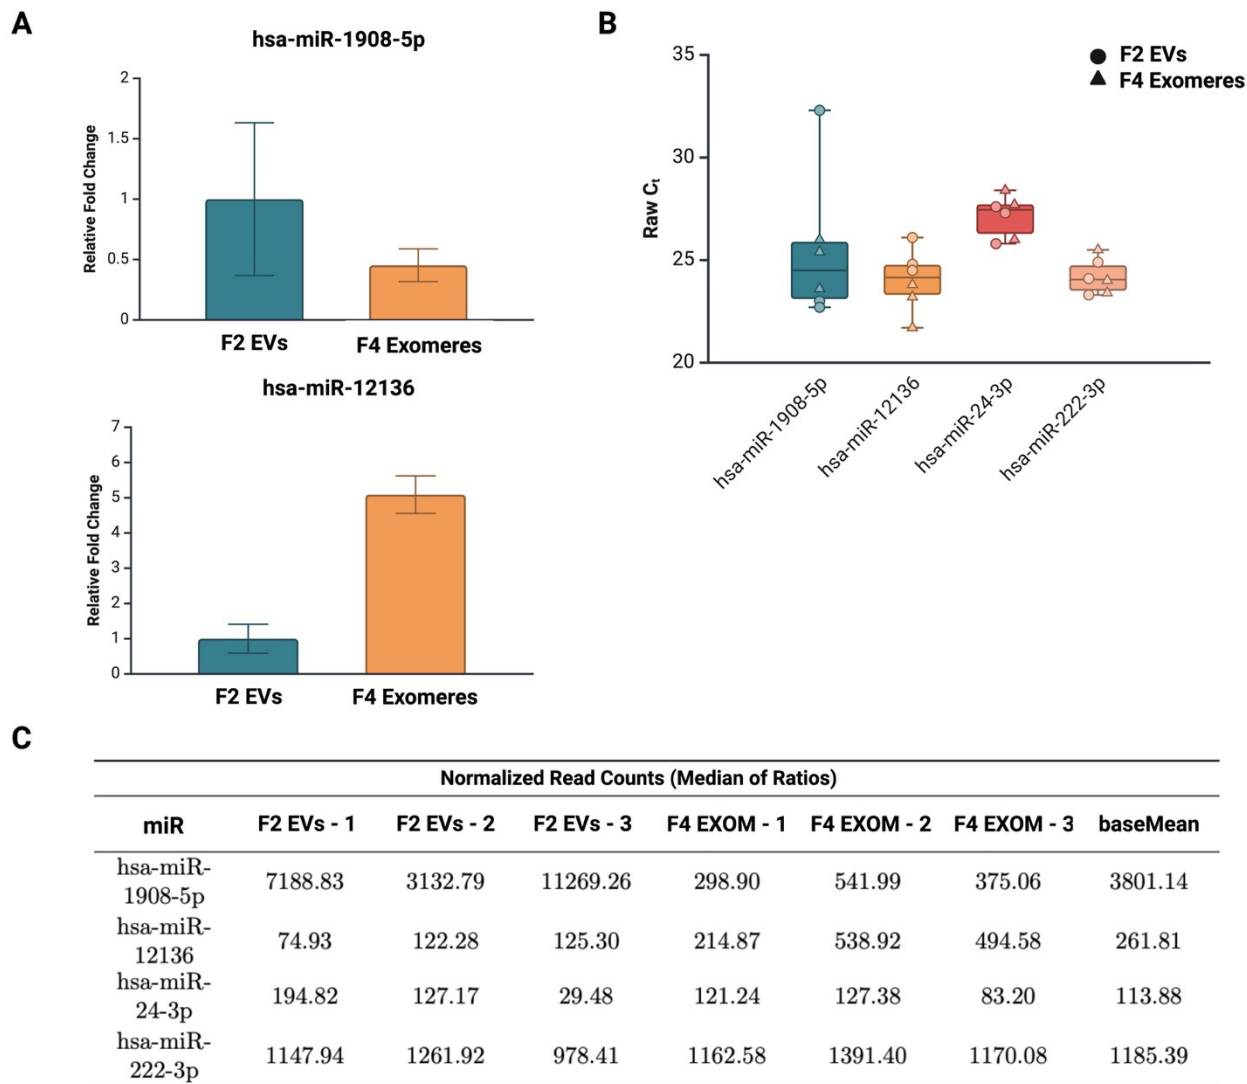

**Supplementary Figure 9:** RT-qPCR validation of differentially and stably expressed miRNAs. **A.** Relative fold change calculated using the  $\Delta\Delta C_t$  method. F2 EVs were taken as the basis. The geometric mean of hsa-miR-24-3p and hsa-miR-222-3p was used for normalization of each sample. **B.** Raw  $C_t$  values for DE miRs and putative reference miRs. **C.** Normalized mean read counts from RNA sequencing for the selected miRs. Figure created with BioRender.com.

| Sample          | Reference miRs |                |                         | Sample          | DE miRs from RNA Seq |      |
|-----------------|----------------|----------------|-------------------------|-----------------|----------------------|------|
|                 | C <sub>t</sub> |                |                         |                 | C <sub>t</sub>       |      |
|                 | hsa-miR-24-3p  | hsa-miR-222-3p | Geo Mean C <sub>t</sub> | hsa-miR-1908-5p | hsa-miR-12136        |      |
| F2 EVs - 1      | 27.3           | 24.1           | 25.7                    | F2 EVs - 1      | 32.3                 | 26.1 |
| F2 EVs - 2      | 27.6           | 24.9           | 26.2                    | F2 EVs - 2      | 23.0                 | 24.8 |
| F2 EVs - 3      | 25.8           | 23.3           | 24.5                    | F2 EVs - 3      | 22.7                 | 24.5 |
| F4 Exomeres - 1 | 28.4           | 25.5           | 26.9                    | F4 Exomeres - 1 | 25.4                 | 23.8 |
| F4 Exomeres - 2 | 27.7           | 24.0           | 25.8                    | F4 Exomeres - 2 | 26.0                 | 23.2 |
| F4 Exomeres - 3 | 26.0           | 23.4           | 24.7                    | F4 Exomeres - 3 | 23.6                 | 21.7 |

| Sample          | ΔC <sub>t</sub> |               | Sample          | ΔΔC <sub>t</sub> (F2 EVs as basis) |               |
|-----------------|-----------------|---------------|-----------------|------------------------------------|---------------|
|                 | hsa-miR-1908-5p | hsa-miR-12136 |                 | hsa-miR-1908-5p                    | hsa-miR-12136 |
| F2 EVs - 1      | 6.6             | 0.4           | F2 EVs - 1      | 6.1                                | 0.8           |
| F2 EVs - 2      | -3.2            | -1.4          | F2 EVs - 2      | -3.8                               | -1.1          |
| F2 EVs - 3      | -1.8            | 0.0           | F2 EVs - 3      | -2.4                               | 0.3           |
| F4 Exomeres - 1 | -1.5            | -3.1          | F4 Exomeres - 1 | -2.0                               | -2.8          |
| F4 Exomeres - 2 | 0.2             | -2.6          | F4 Exomeres - 2 | -0.3                               | -2.3          |
| F4 Exomeres - 3 | -1.1            | -3.0          | F4 Exomeres - 3 | -1.6                               | -2.6          |

|                                    |     |      |
|------------------------------------|-----|------|
| Avg. ΔC <sub>t</sub> (F2 as basis) | 0.5 | -0.3 |
|------------------------------------|-----|------|

| Sample          | 2 <sup>-ΔΔC<sub>t</sub></sup> (F2 EVs as basis) |               | Sample          | Relative Fold Change |               |
|-----------------|-------------------------------------------------|---------------|-----------------|----------------------|---------------|
|                 | hsa-miR-1908-5p                                 | hsa-miR-12136 |                 | hsa-miR-1908-5p      | hsa-miR-12136 |
| F2 EVs - 1      | 0.01447                                         | 0.58329       | F2 EVs - 1      | 0.00233              | 0.49783       |
| F2 EVs - 2      | 13.49239                                        | 2.12492       | F2 EVs - 2      | 2.17271              | 1.81358       |
| F2 EVs - 3      | 5.12293                                         | 0.80681       | F2 EVs - 3      | 0.82496              | 0.68860       |
| F4 Exomeres - 1 | 4.14042                                         | 6.88334       | F4 Exomeres - 1 | 0.66674              | 5.87479       |
| F4 Exomeres - 2 | 1.25052                                         | 4.77619       | F4 Exomeres - 2 | 0.20137              | 4.07638       |
| F4 Exomeres - 3 | 3.04107                                         | 6.22430       | F4 Exomeres - 3 | 0.48971              | 5.31231       |

|                                                         |         |         |
|---------------------------------------------------------|---------|---------|
| Average 2 <sup>-ΔΔC<sub>t</sub></sup> (F2 EVs as basis) | 6.20993 | 1.17167 |
|---------------------------------------------------------|---------|---------|

**Supplementary Figure 9 (continued):** Relative fold change calculations for F2 EV and F4 exomere miRs validated with RT-qPCR.

**References:**

1. J. Ren, Z. Li and F.-S. Wong, *Journal of Membrane Science*, 2006, **279**, 558–569.
2. S. Singh, K. C. Khulbe, T. Matsuura and P. Ramamurthy, *Journal of Membrane Science*, 1998, **142**, 111–127.
